# Supplementary material
Source: publisher site journal article supplement (https://www.spandidos-publications.com/4343/downloadSupplementary)
Supplement: Supplementary file 1 [file downloadSupplementary]

Figure S1. Comparison of the frequencies (%) of  $\beta$ -thalassemia mutations in southern Thailand.

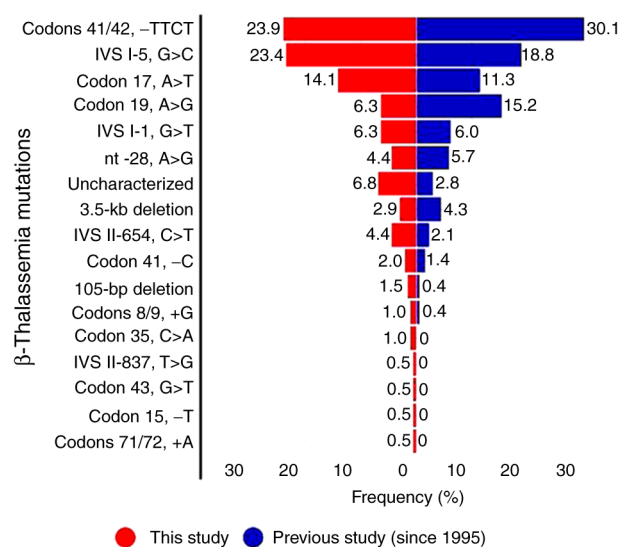

Made with infogram
